# Supplementary material for: Maternal and Intrauterine Influences on Feto-Placental Growth Are Accompanied by Sexually Dimorphic Changes in Placental Mitochondrial Respiration, and Metabolic Signalling Pathways
Source: MDPI journal article supplement (doi:10.3390/cells12050797), 2023-03-03
Supplement: s1 [file s1]

Supplementary Materials

# Maternal and Intrauterine Influences on Feto-Placental Growth Are Accompanied by Sexually Dimorphic Changes in Placental Mitochondrial Respiration, and Metabolic Signalling Pathways

Esteban Salazar-Petres <sup>1,†</sup>, Daniela Pereira-Carvalho <sup>2,†</sup>, Jorge Lopez-Tello <sup>2,\*,‡</sup> and Amanda N. Sferruzzi-Perri <sup>2,\*,‡</sup>

<sup>1</sup> Departamento de Ciencias Básicas, Facultad de Ciencias, Universidad Santo Tomás, Valdivia 5090000, Chile; e.salazar.petres@gmail.com

<sup>2</sup> Centre for Trophoblast Research, Department of Physiology, Development and Neuroscience, University of Cambridge, Cambridge CB2 3EG, UK; carvalho.pdaniela@gmail.com

\* Correspondence: jl898@cam.ac.uk (J.L.-T.); ans48@cam.ac.uk (A.N.S.-P.)

† These authors contributed equally to this work.

‡ These authors contributed equally to this work.

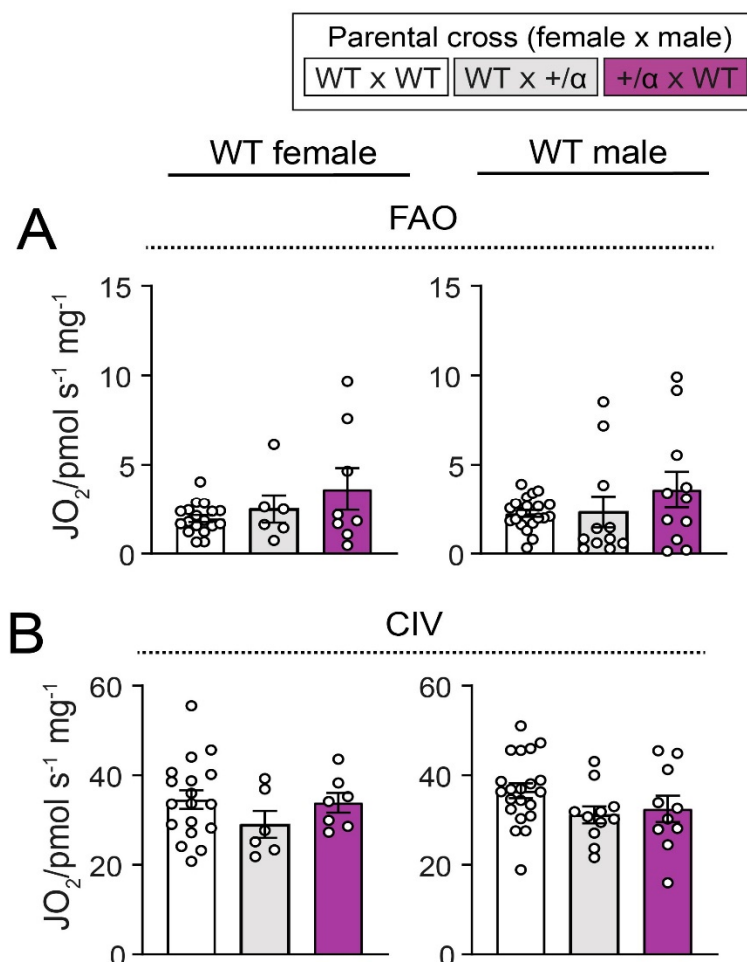

**Figure S1.** Placental mitochondrial bioenergetics of WT conceptuses in response to littermate and/or maternal p110α deficiency. Oxygen consumption linked to mitochondrial fatty acid oxidation (**A**) and CIV (**B**) in the placental LZ of females and males on day 18 of pregnancy. Data are from WT fetuses generated by WT x WT, WT x α/+ and α/+ x WT parental crosses ( $n = 1-2$  fetuses/sex/dam

with 5–12 dams/group) and are displayed as individual data points with mean  $\pm$  S.E.M. Data were analyzed by one-way ANOVA with Tukey *post hoc* pairwise comparisons.

**Table S1.** List of primary antibodies used in this study.

| Primary Antibody                            | Host/ Isotype | Manufacturer, Catalogue Number | Dilution |
|---------------------------------------------|---------------|--------------------------------|----------|
| AKT                                         | Rabbit        | Cell Signalling, 9272          | 1/1000   |
| Phospho-AKT (Ser473)                        | Rabbit        | Cell Signalling, 9271          | 1/1000   |
| Phospho-AMPK (Thr172)                       | Rabbit        | Cell Signalling, 2535          | 1/1000   |
| P44/42 MAPK (Erk1/2)                        | Rabbit,       | Cell Signalling, 4695          | 1/1000   |
| Phospho-MAPK-p44/42 (Erk1/2; Thr202/Tyr204) | Rabbit IgG    | Cell Signalling, 4370          | 1/1000   |
| Total-p38 MAPK                              | Rabbit IgG    | Cell Signalling, 8690          | 1/1000   |
| Phospho-p38 MAPK (Thr180/Tyr182)            | Rabbit IgG    | Cell Signalling, 4511          | 1/1000   |
| UCP2                                        | Rabbit IgG    | Biologend, 615902              | 1/500    |
| PGC-1 $\alpha$                              | Rabbit        | Santa Cruz, sc-13067           | 1/1000   |
| OXPHOS                                      | Mouse IgG     | Thermo Fisher, 45-8099         | 1/250    |
| Citrate synthase                            | Rabbit        | Abcam, ab9660                  | 1/1000   |
| PPAR- $\gamma$                              | Mouse IgG     | Santa Cruz, sc-7273            | 1/200    |

**Table S2.** Litter size and composition.

|                                | WT x WT          | WT x $\alpha/+$   | $\alpha/+$ x WT  | <i>p</i> Value |
|--------------------------------|------------------|-------------------|------------------|----------------|
| Litter size                    | 7.92 $\pm$ 0.36  | 7.40 $\pm$ 0.93   | 7.46 $\pm$ 0.49  | 0.7251         |
| % Females in the litter        | 48.28 $\pm$ 3.46 | 44.33 $\pm$ 6.30  | 59.44 $\pm$ 6.25 | 0.1474         |
| % Mutants in the litter        | -                | 41.43 $\pm$ 11.01 | 61.33 $\pm$ 6.30 | 0.1933         |
| % Mutant females in the litter | -                | 32.02 $\pm$ 10.36 | 35.12 $\pm$ 7.29 | 0.1234         |
